# Supplementary material for: Genomic monitoring to understand the emergence and spread of Usutu virus in the Netherlands, 2016–2018
Source: PubMed Central journal article supplement (PMC7029044; doi:10.1038/s41598-020-59692-y), 2020-02-18
Supplement: 41598_2020_59692_MOESM1_ESM.pdf [file 41598_2020_59692_MOESM1_ESM.pdf]

# Genomic monitoring to understand the emergence and spread of Usutu virus in the Netherlands, 2016-2018

B.B. Oude Munnink<sup>1\*</sup>, E. Münger<sup>1\*</sup>, D.F. Nieuwenhuijse<sup>1</sup>, R. Kohl<sup>1</sup>, A. van der Linden<sup>1</sup>, C.M.E Schapendonk<sup>1</sup>, H. van der Jeugd<sup>2</sup>, M. Kik<sup>3,4</sup>, J. M. Rijks<sup>3</sup>, C.B.E.M. Reusken<sup>1,5\*</sup> and M. Koopmans<sup>1\*</sup>

## Affiliations

<sup>1</sup> ErasmusMC, Department of Viroscience, WHO collaborating centre for arbovirus and viral hemorrhagic fever Reference and Research, Rotterdam, the Netherlands

<sup>2</sup> Vogeltrekstation - Dutch Centre for Avian Migration and Demography, NIOO-KNAW, Wageningen, the Netherlands

<sup>3</sup> Dutch Wildlife Health Centre, University of Utrecht, the Netherlands

<sup>4</sup> Department of Pathobiology, Pathology, Faculty of Veterinary Medicine, Utrecht University, the Netherlands

<sup>5</sup> Current co-affiliate: Centre for Infectious Disease Control, National Institute for Public Health and the Environment, Bilthoven, the Netherlands

\* These authors contributed equally to this manuscript

^ Corresponding author: ([b.oudemunnink@erasmusmc.nl](mailto:b.oudemunnink@erasmusmc.nl))

# Supplementary Files

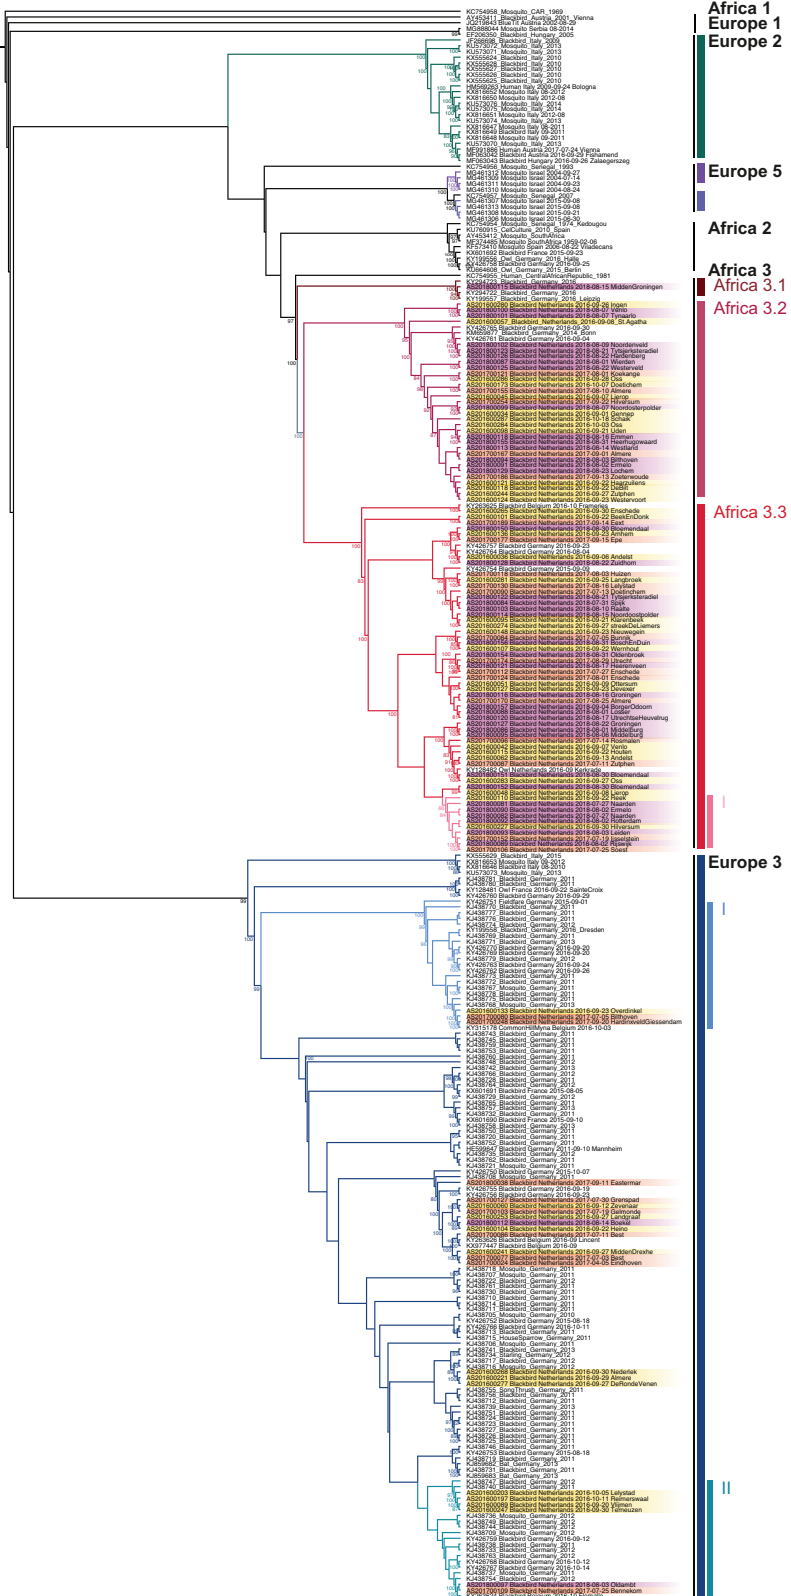

**Supplementary figure 1: Maximum likelihood phylogeny of USUV complete coding region sequences.** Bootstrap scores ( $\geq 80\%$ ) are shown next to well-supported node. Tip labels are highlighted according to year of death (yellow: 2016, orange: 2017, red: 2018). Branches are transformed proportionally for clarity reasons.

**Supplementary movie 1: Geographic distribution of USUV strains detected in dead blackbirds in the Netherlands.** Dots are colored according to the USUV cluster detected.

**Supplementary table 1: Detailed overview of the different USUV blackbird samples sequenced during this study.** Overview of the number of reads generated, the percentage of USUV reads and the proportion of successfully sequenced amplicons

| Sample ID   | Accession number | Ct Value | Collection date | Location     | USUV lineage | No. of reads | Number USUV reads | % USUV reads | % Genome coverage |
|-------------|------------------|----------|-----------------|--------------|--------------|--------------|-------------------|--------------|-------------------|
| AS201600034 | MN122145         | 19,45    | 01-09-2016      | Gennep       | Africa 3.2   | 40.010       | 37.841            | 94,58%       | 100,00%           |
| AS201600036 | MN122146         | 15,38    | 06-09-2016      | Andelst      | Africa 3.3   | 254.841      | 235.629           | 92,46%       | 100,00%           |
| AS201600042 | MN122147         | 14,21    | 07-09-2016      | Venlo        | Africa 3.3   | 396.530      | 364.347           | 91,88%       | 94,51%            |
| AS201600045 | MN122148         | 14,97    | 07-09-2016      | Lierop       | Africa 3.2   | 273.363      | 243.520           | 89,08%       | 100,00%           |
| AS201600048 | MN122149         | 19,74    | 07-09-2016      | Lierop       | Africa 3.3   | 450.846      | 433.660           | 96,19%       | 100,00%           |
| AS201600051 | MN122150         | 21,44    | 07-09-2016      | Ottersum     | Africa 3.3   | 59.699       | 55.614            | 93,16%       | 100,00%           |
| AS201600057 | MN122151         | 15,6     | 08-09-2016      | Sint Agatha  | Africa 3.2   | 206.154      | 196.488           | 95,31%       | 100,00%           |
| AS201600060 | MN122152         | 19,75    | 12-09-2016      | Zevenaar     | Europe 3     | 181.639      | 171.876           | 94,63%       | 100,00%           |
| AS201600062 | MN122153         | 16,99    | 13-09-2016      | Andelst      | Africa 3.3   | 351.520      | 324.641           | 92,35%       | 100,00%           |
| AS201600089 | MN122154         | 21,08    | 20-09-2016      | Vlijmen      | Europe 3     | 436.160      | 425.473           | 97,55%       | 100,00%           |
| AS201600095 | MN122155         | 19,78    | 21-09-2016      | Klarenbeek   | Africa 3.3   | 113.366      | 108.617           | 95,81%       | 100,00%           |
| AS201600098 | MN122156         | 20,73    | 21-09-2016      | Uden         | Africa 3.2   | 459.499      | 422.739           | 92,00%       | 100,00%           |
| AS201600101 | MN122157         | 20,34    | 22-09-2016      | Beek en Donk | Africa 3.3   | 214.104      | 206.415           | 96,41%       | 100,00%           |
| AS201600104 | MN122158         | 18,92    | 22-09-2016      | Heino        | Europe 3     | 243.265      | 232.577           | 95,61%       | 100,00%           |
| AS201600107 | MN122159         | 21,85    | 22-09-2016      | Wernhout     | Africa 3.3   | 67.923       | 65.310            | 96,15%       | 100,00%           |
| AS201600110 | MN122160         | 24,21    | 22-09-2016      | Reek         | Africa 3.3   | 385.874      | 361.013           | 93,56%       | 100,00%           |
| AS201600115 | MN122161         | 24,06    | 22-09-2016      | Houten       | Africa 3.3   | 233.497      | 216.505           | 92,72%       | 100,00%           |
| AS201600118 | MN122162         | 21,02    | 22-09-2016      | De Bilt      | Africa 3.2   | 358.807      | 334.651           | 93,27%       | 100,00%           |
| AS201600121 | MN122163         | 20,39    | 22-09-2016      | Haarzuilens  | Africa 3.2   | 287.872      | 258.695           | 89,86%       | 100,00%           |
| AS201600124 | MN122164         | 23,8     | 23-09-2016      | Westervoort  | Africa 3.2   | 653.893      | 599.948           | 91,75%       | 100,00%           |
| AS201600127 | MN122165         | 17,47    | 23-09-2016      | Deventer     | Africa 3.3   | 427.978      | 392.524           | 91,72%       | 100,00%           |
| AS201600133 | MN122166         | 22,59    | 23-09-2016      | Overdinkel   | Europe 3     | 313.623      | 288.572           | 92,01%       | 100,00%           |
| AS201600136 | MN122167         | 16,99    | 23-09-2016      | Arnhem       | Africa 3.3   | 148.532      | 138.454           | 93,21%       | 100,00%           |
| AS201600148 | MN122168         | 24,79    | 23-09-2016      | Nieuwegein   | Africa 3.3   | 205.086      | 180.965           | 88,24%       | 100,00%           |
| AS201600173 | MN122169         | 20,33    | 07-10-2016      | Doetichem    | Africa 3.2   | 366.043      | 336.169           | 91,84%       | 100,00%           |

|             |          |       |            |                   |            |           |           |         |         |
|-------------|----------|-------|------------|-------------------|------------|-----------|-----------|---------|---------|
| AS201600197 | MN122170 | 20,13 | 11-10-2016 | Reimerswaal       | Europe 3   | 445.535   | 415.996   | 93,37%  | 100,00% |
| AS201600203 | MN122171 | 32,01 | 05-10-2016 | Lelystad          | Europe 3   | 395.173   | 179.137   | 45,33%  | 86,64%  |
| AS201600221 | MN122172 | 19,95 | 22-09-2016 | Haarzuilens       | Europe 3   | 254.400   | 243.169   | 95,59%  | 100,00% |
| AS201600227 | MN122173 | 26,23 | 30-09-2016 | Hilversum         | Africa 3.3 | 438.874   | 374.117   | 85,24%  | 100,00% |
| AS201600241 | MN122174 | 20,16 | 27-09-2016 | Midden-Drenthe    | Europe 3   | 389.453   | 332.443   | 85,36%  | 100,00% |
| AS201600244 | MN122175 | 18,89 | 27-09-2016 | Zutphen           | Africa 3.2 | 470.128   | 445.731   | 94,81%  | 100,00% |
| AS201600247 | MN122176 | 14,07 | 30-09-2016 | Terneuzen         | Europe 3   | 463.113   | 440.036   | 95,02%  | 100,00% |
| AS201600253 | MN122177 | 21,51 | 27-09-2016 | Landgraaf         | Europe 3   | 437.136   | 413.027   | 94,48%  | 100,00% |
| AS201600265 | MN122178 | 16,48 | 30-09-2016 | Enschede          | Africa 3.3 | 420.124   | 399.179   | 95,01%  | 100,00% |
| AS201600268 | MN122179 | 16,72 | 30-09-2016 | Nederlek          | Europe 3   | 406.571   | 378.076   | 92,99%  | 100,00% |
| AS201600274 | MN122180 | 21,11 | 27-09-2016 | streek De Liemers | Africa 3.3 | 466.939   | 427.548   | 91,56%  | 100,00% |
| AS201600277 | MN122181 | 17,43 | 27-09-2016 | De Ronde Venen    | Europe 3   | 267.079   | 248.174   | 92,92%  | 100,00% |
| AS201600280 | MN122182 | 21,87 | 26-09-2016 | Ingen             | Africa 3.2 | 363.218   | 337.978   | 93,05%  | 100,00% |
| AS201600281 | MN122183 | 14,07 | 25-09-2016 | Langbroek         | Africa 3.3 | 532.467   | 505.856   | 95,00%  | 100,00% |
| AS201600283 | MN122184 | 19,94 | 27-09-2016 | Oss               | Africa 3.3 | 501.407   | 469.245   | 93,59%  | 100,00% |
| AS201600284 | MN122185 | 20,09 | 03-10-2016 | Oss               | Africa 3.2 | 492.022   | 462.800   | 94,06%  | 100,00% |
| AS201600286 | MN122186 | 28,48 | 28-09-2016 | Oss               | Africa 3.2 | 381.449   | 277.571   | 72,77%  | 100,00% |
| AS201600287 | MN122187 | 14,46 | 27-09-2016 | Schaik            | Africa 3.2 | 302.225   | 284.593   | 94,17%  | 100,00% |
| AS201700024 | MN122188 | 19,88 | 11-04-2017 | Westvoort         | Europe 3   | 2.202.744 | 2.052.733 | 93,19%  | 100,00% |
| AS201700077 | MN122189 | 16,8  | 03-07-2017 | Best              | Europe 3   | 79.111    | 76.327    | 96,48%  | 100,00% |
| AS201700080 | MN122190 | 19,6  | 05-07-2017 | Bilthoven         | Europe 3   | 213.003   | 206.206   | 96,81%  | 100,00% |
| AS201700084 | MN122191 | 16,6  | 05-07-2017 | Bunnik            | Africa 3.3 | 418.412   | 403.924   | 96,54%  | 100,00% |
| AS201700086 | MN122192 | 18,3  | 11-07-2017 | Best              | Europe 3   | 145.556   | 403.924   | 277,50% | 100,00% |
| AS201700087 | MN122193 | 17    | 11-07-2017 | Zutphen           | Africa 3.3 | 380.108   | 356.528   | 93,80%  | 100,00% |
| AS201700090 | MN122194 | 13,9  | 13-07-2017 | Doetinchem        | Africa 3.3 | 212.170   | 193.097   | 91,01%  | 100,00% |
| AS201700096 | MN122195 | 14,4  | 14-07-2017 | Rosmalen          | Africa 3.3 | 256.479   | 232.270   | 90,56%  | 100,00% |
| AS201700103 | MN122196 | 22,7  | 19-07-2017 | Gemonde           | Europe 3   | 479.852   | 442.595   | 92,24%  | 100,00% |
| AS201700106 | MN122197 | 23,8  | 25-07-2017 | Soest             | Africa 3.3 | 379.681   | 352.017   | 92,71%  | 100,00% |
| AS201700109 | MN122198 | 25,2  | 25-07-2017 | Bennekom          | Europe 3   | 304.296   | 279.945   | 92,00%  | 100,00% |
| AS201700112 | MN122199 | 18    | 27-07-2017 | Enschede          | Africa 3.3 | 194.224   | 175.633   | 90,43%  | 100,00% |
| AS201700118 | MN122200 | 22    | 03-08-2017 | Huizen            | Africa 3.3 | 305.646   | 280.816   | 91,88%  | 100,00% |
| AS201700121 | MN122201 | 27,8  | 01-08-2017 | Koekange          | Africa 3.2 | 347.015   | 327.754   | 94,45%  | 100,00% |
| AS201700124 | MN122202 | 16,4  | 01-08-2017 | Enschede          | Africa 3.3 | 213.519   | 195.685   | 91,65%  | 100,00% |
| AS201700127 | MN122203 | 26,6  | 30-07-2017 | Grenspad          | Europe 3   | 458.254   | 430.715   | 93,99%  | 100,00% |
| AS201700130 | MN122204 | 20,5  | 16-08-2017 | Lelystad          | Africa 3.3 | 243.535   | 219.390   | 90,09%  | 100,00% |
| AS201700152 | MN122205 | 24,98 | 19-07-2017 | IJsselstein       | Africa 3.3 | 705.980   | 666.427   | 94,40%  | 100,00% |
| AS201700155 | MN122206 | 15,13 | 10-08-2017 | Almere            | Africa 3.2 | 867.951   | 830.630   | 95,70%  | 100,00% |
| AS201700167 | MN122207 | 29,27 | 01-09-2017 | Almere            | Africa 3.3 | 110.557   | 91.170    | 82,46%  | 97,89%  |
| AS201700170 | MN122208 | 26,03 | 25-08-2017 | Almere            | Africa 3.3 | 771.864   | 720.961   | 93,41%  | 100,00% |
| AS201700174 | MN122209 | 22,72 | 29-08-2017 | Utrecht           | Africa 3.3 | 466.475   | 443.038   | 94,98%  | 100,00% |
| AS201700177 | MN122210 | 21,85 | 15-09-2017 | Epe               | Africa 3.3 | 433.446   | 418.002   | 96,44%  | 100,00% |
| AS201700186 | MN122211 | 23,93 | 13-09-2017 | Zoeterwoude       | Africa 3.2 | 391.377   | 378.852   | 96,80%  | 100,00% |
| AS201700189 | MN122212 | 16,52 | 14-09-2017 | Eext              | Africa 3.3 | 601.308   | 590.793   | 98,25%  | 100,00% |

|             |          |       |            |                              |            |         |         |        |         |
|-------------|----------|-------|------------|------------------------------|------------|---------|---------|--------|---------|
| AS201700248 | MN122213 | 23,65 | 20-09-2017 | Hardinxveld-Giessendam       | Europe 3   | 882.815 | 866.286 | 98,13% | 100,00% |
| AS201700254 | MN122214 | 17,92 | 22-09-2017 | Hilversum                    | Africa 3.2 | 620.452 | 612.027 | 98,64% | 100,00% |
| AS201800038 | MN122215 | 17,75 | 11-09-2017 | Eastermar                    | Europe 3   | 299.889 | 296.586 | 98,90% | 100,00% |
| AS201800081 | MN122216 | 17,69 | 27-07-2018 | Naarden                      | Africa 3.3 | 201.765 | 186.011 | 92,19% | 100,00% |
| AS201800082 | MN122217 | 20,39 | 27-07-2018 | Naarden Spijk (West Betuwe)  | Africa 3.3 | 164.990 | 151.905 | 92,07% | 100,00% |
| AS201800084 | MN122218 | 27,04 | 31-07-2018 | Middelburg                   | Africa 3.3 | 187.723 | 170.358 | 90,75% | 100,00% |
| AS201800086 | MN122219 | 27,86 | 01-08-2018 | Wierden                      | Africa 3.3 | 130.755 | 118.471 | 90,61% | 100,00% |
| AS201800087 | MN122220 | 21,72 | 01-08-2018 | Losser                       | Africa 3.2 | 263.219 | 239.759 | 91,09% | 100,00% |
| AS201800088 | MN122221 | 18,60 | 01-08-2018 | Rijswijk                     | Africa 3.3 | 124.856 | 115.675 | 92,65% | 100,00% |
| AS201800089 | MN122222 | 22,61 | 02-08-2018 | Ermelo                       | Africa 3.3 | 186.351 | 175.797 | 94,34% | 100,00% |
| AS201800090 | MN122223 | 28,02 | 02-08-2018 | Ermelo                       | Africa 3.3 | 206.888 | 188.010 | 90,88% | 100,00% |
| AS201800091 | MN122224 | 17,73 | 02-08-2018 | Rotterdam                    | Africa 3.2 | 191.812 | 180.871 | 94,30% | 100,00% |
| AS201800092 | MN122225 | 23,42 | 02-08-2018 | Leiden                       | Africa 3.3 | 123.066 | 117.020 | 95,09% | 100,00% |
| AS201800093 | MN122226 | 19,40 | 03-08-2018 | Bilthoven                    | Africa 3.3 | 140.942 | 134.495 | 95,43% | 100,00% |
| AS201800094 | MN122227 | 20,94 | 03-08-2018 | Middelburg                   | Africa 3.2 | 597.892 | 580.684 | 97,12% | 100,00% |
| AS201800095 | MN122228 | 23,58 | 06-08-2018 | Oldambt                      | Africa 3.3 | 210.387 | 203.003 | 96,49% | 100,00% |
| AS201800097 | MN122229 | 28,93 | 03-08-2018 | Noordosterpolder             | Europe 3   | 266.655 | 229.877 | 86,21% | 97,34%  |
| AS201800099 | MN122230 | 22,52 | 07-08-2018 | Venlo                        | Africa 3.2 | 144.958 | 141.853 | 97,86% | 100,00% |
| AS201800100 | MN122231 | 20,24 | 07-08-2018 | Tynaarlo                     | Africa 3.2 | 253.288 | 249.075 | 98,34% | 100,00% |
| AS201800101 | MN122232 | 27,4  | 07-08-2018 | Noordenveld                  | Africa 3.2 | 442.866 | 425.879 | 96,16% | 100,00% |
| AS201800102 | MN122233 | 20,81 | 09-08-2018 | Raalte                       | Africa 3.2 | 528.607 | 519.205 | 98,22% | 100,00% |
| AS201800103 | MN122234 | 22,19 | 10-08-2018 | Boekel                       | Africa 3.3 | 256.294 | 252.060 | 98,35% | 100,00% |
| AS201800112 | MN122235 | 16,36 | 14-08-2018 | Westland                     | Europe 3   | 435.437 | 427.323 | 98,14% | 100,00% |
| AS201800113 | MN122236 | 15,97 | 14-08-2018 | Noordoostpolder Midden       | Africa 3.2 | 416.013 | 409.277 | 98,38% | 100,00% |
| AS201800114 | MN122237 | 22,70 | 15-08-2018 | Groningen                    | Africa 3.3 | 328.036 | 317.647 | 96,83% | 100,00% |
| AS201800115 | MN122238 | 23,17 | 15-08-2018 | Groningen                    | Africa 3.1 | 261.869 | 247.512 | 94,52% | 100,00% |
| AS201800116 | MN122239 | 17,15 | 16-08-2018 | Den Haag Utrechtse Heuvelrug | Africa 3.3 | 459.144 | 450.702 | 98,16% | 100,00% |
| AS201800118 | MN122240 | 25,68 | 16-08-2018 | Heerenveen                   | Africa 3.2 | 681.112 | 645.628 | 94,79% | 100,00% |
| AS201800120 | MN122241 | 22,09 | 17-08-2018 | Tytsjerksteradiel            | Africa 3.3 | 659.508 | 639.906 | 97,03% | 100,00% |
| AS201800121 | MN122242 | 17,80 | 17-08-2018 | Tytsjerksteradiel            | Africa 3.3 | 516.450 | 504.976 | 97,78% | 100,00% |
| AS201800122 | MN122243 | 21,00 | 21-08-2018 | Westerveld                   | Africa 3.3 | 416.489 | 404.015 | 97,00% | 100,00% |
| AS201800123 | MN122244 | 20,02 | 21-08-2018 | Westerveld                   | Africa 3.2 | 270.594 | 263.338 | 97,32% | 100,00% |
| AS201800125 | MN122245 | 25,03 | 22-08-2018 | Hardenberg                   | Africa 3.2 | 527.696 | 509.063 | 96,47% | 100,00% |
| AS201800126 | MN122246 | 24,00 | 22-08-2018 | Groningen                    | Africa 3.2 | 463.225 | 449.932 | 97,13% | 100,00% |
| AS201800127 | MN122247 | 25,07 | 22-08-2018 | Zuidhorn                     | Africa 3.3 | 460.008 | 438.914 | 95,41% | 100,00% |
| AS201800128 | MN122248 | 15,74 | 22-08-2018 | Lochem                       | Africa 3.3 | 374.471 | 371.035 | 99,08% | 100,00% |
| AS201800129 | MN122249 | 21,44 | 23-08-2018 | Bloemendaal                  | Africa 3.2 | 363.990 | 356.906 | 98,05% | 100,00% |
| AS201800150 | MN122250 | 23,67 | 30-08-2018 | Bloemendaal                  | Africa 3.3 | 286.767 | 276.889 | 96,56% | 100,00% |
| AS201800151 | MN122251 | 24,42 | 30-08-2018 | Bloemendaal                  | Africa 3.3 | 549.326 | 530.730 | 96,61% | 100,00% |
| AS201800152 | MN122252 | 20,87 | 30-08-2018 | Oldenbroek                   | Africa 3.3 | 537.086 | 521.579 | 97,11% | 100,00% |
| AS201800154 | MN122253 | 17,26 | 31-08-2018 | Heerhugowaard                | Africa 3.3 | 519.146 | 506.212 | 97,51% | 100,00% |
| AS201800155 | MN122254 | 16,16 | 31-08-2018 | Heerhugowaard                | Africa 3.2 | 242.133 | 236.605 | 97,72% | 100,00% |

|             |          |       |            |               |            |         |         |        |         |
|-------------|----------|-------|------------|---------------|------------|---------|---------|--------|---------|
| AS201800156 | MN122255 | 17,99 | 31-08-2018 | Bosch en Duin | Africa 3.3 | 373.410 | 361.638 | 96,85% | 100,00% |
| AS201800157 | MN122256 | 22,89 | 04-09-2018 | Borger-Odoorn | Africa 3.3 | 437.003 | 422.010 | 96,57% | 100,00% |
